# Supplementary material for: Reinvestigation of the formation of a mononuclear Fe(iii) hydroperoxido complex using high pressure kinetics
Source: Royal Society of Chemistry journal article supplement (doi:10.1039/c0dt00247j), 2010-01-01
Supplement: c0dt00247j.pdf [file c0dt00247j.pdf]

## Electronic Supporting Information

### Syntheses and structural characterization of the cobalt complexes

#### [Co(bztpen)Cl]BF<sub>4</sub> (3)

42.4 mg (0.1 mmol) bztpen and 23.8 mg (0.1 mmol) CoCl<sub>2</sub> x 6 H<sub>2</sub>O were dissolved in 1 ml methanol. This solution was layered with a solution of 11.0 mg (0.1 mmol) NaBF<sub>4</sub> dissolved in 0.5 ml of methanol. Overnight purple block shaped crystals, suitable for X-ray analysis were formed. Calc. for C<sub>27</sub>H<sub>29</sub>BClF<sub>4</sub>CoN<sub>5</sub>: C, 53.62; H, 4.83; N, 11.58%. Found: C, 52.54; H, 4.83; N, 11.32% ESIMS (CH<sub>3</sub>CN), *m/z* (% assignment): 241.61 (55, [Co(bztpen)]<sup>2+</sup>), 256.61 (40, [Co(bztpen)Cl]<sup>2+</sup>), 518.17 (100, [Co(bztpen)Cl]<sup>+</sup>).

#### [Co(metpen)Cl]SbF<sub>6</sub> (4)

104.2 mg (0.3 mmol) metpen and 66.6 mg (0.28 mmol) CoCl<sub>2</sub> x 6 H<sub>2</sub>O were dissolved in 1 ml methanol and the resulting brown to violet solution was stirred for 15 min. 37.0 mg (0.14 mmol) NaSbF<sub>6</sub> dissolved in 1.5 ml MeOH were added. A purple powder was precipitated by adding the complex solution to diethyl ether. The solution was decanted and the precipitate was dried in air. Redissolving in acetone and diffusion of diethyl ether into this solution at room temperature yielded after 12 h purple single crystals, suitable for x-ray analysis. Calc. for C<sub>21</sub>H<sub>25</sub>ClF<sub>6</sub>CoN<sub>5</sub>Sb: C, 37.22; H, 3.72; N, 10.34%. Found: C, 37.13; H, 3.63; N, 10.57% ESIMS (CH<sub>3</sub>CN), *m/z* (% assignment): 203.08 (55, [Co(metpen)]<sup>2+</sup>), 220.58 (40, [Co(metpen)Cl]<sup>2+</sup>), 441.07 (100, [Co(metpen)Cl]<sup>+</sup>).

#### [Co(bztpen)(OAc)]BPh<sub>4</sub> (5)

20.0 mg (0.05 mmol) bztpen and 11.2 mg (0.045 mmol) Co(OAc)<sub>2</sub> x 4 H<sub>2</sub>O were dissolved in 1 ml methanol. A solution of 15.1 mg (0.044 mol) NaBPh<sub>4</sub> in 0.5 ml methanol was added. A precipitate was formed immediately, which was redissolved by adding 1.5 ml of dichloromethane. Salmon colored block shaped single crystals were obtained by diffusion of diethyl ether at room temperature after 12 h. C<sub>53</sub>H<sub>52</sub>BCoN<sub>5</sub>O<sub>2</sub>: C, 73.95; H, 6.09; N, 8.14%. Found: C, 73.18; H, 6.02; N, 7.78% ESIMS (CH<sub>3</sub>CN), *m/z* (% assignment): 241.61 (85, [Co(bztpen)]<sup>2+</sup>), 527.12 (100, [Co(bztpen)(HCO<sub>2</sub>)]<sup>+</sup>), 517.16 (60, [Co(bztpen)Cl]<sup>+</sup>).

**Table S1** crystal and structure refinement data

|                                                 | <b>3</b>                                                              | <b>4</b>                                                               | <b>5</b>                                                           |
|-------------------------------------------------|-----------------------------------------------------------------------|------------------------------------------------------------------------|--------------------------------------------------------------------|
| Empirical formula                               | C <sub>27</sub> H <sub>28</sub> B Cl Co F <sub>4</sub> N <sub>5</sub> | C <sub>21</sub> H <sub>25</sub> Cl Co F <sub>6</sub> N <sub>5</sub> Sb | C <sub>53</sub> H <sub>52</sub> B Co N <sub>5</sub> O <sub>2</sub> |
| Formula weight                                  | 603.73                                                                | 677.59                                                                 | 860.74                                                             |
| Crystal system                                  | orthorhombic                                                          | orthorhombic                                                           | triclinic                                                          |
| Space group                                     | Pbca                                                                  | Pca2(1)                                                                | P-1                                                                |
| a/Å                                             | 16.309(3)                                                             | 18.260(4)                                                              | 13.234(3)                                                          |
| b/Å                                             | 17.791(4)                                                             | 9.1630(18)                                                             | 13.491(3)                                                          |
| c/Å                                             | 18.066(4)                                                             | 15.057(3)                                                              | 13.920(3)                                                          |
| α/°                                             | 90                                                                    | 90                                                                     | 96.33(3)                                                           |
| β/°                                             | 90                                                                    | 90                                                                     | 114.02(3)                                                          |
| γ/°                                             | 90                                                                    | 90                                                                     | 101.27(3)                                                          |
| V/Å <sup>3</sup>                                | 5241.9(18)                                                            | 2519.3(9)                                                              | 2175.8(8)                                                          |
| Z                                               | 8                                                                     | 4                                                                      | 2                                                                  |
| D <sub>calc</sub> /g cm <sup>3</sup>            | 1.530                                                                 | 1.787                                                                  | 1.314                                                              |
| T/K                                             | 193(2)                                                                | 193(2)                                                                 | 193(2)                                                             |
| μ(MoK <sub>α</sub> )/mm <sup>-1</sup>           | 0.813                                                                 | 1.901                                                                  | 0.443                                                              |
| Crystal size/mm                                 | 0.36 x 0.36 x 0.48                                                    | 0.53 x 0.38 x 0.04                                                     | 0.38 x 0.30 x 0.50                                                 |
| F(000)                                          | 2480                                                                  | 1340                                                                   | 906                                                                |
| θ range/°                                       | 2.55 - 28.09                                                          | 4.24 - 28.05                                                           | 2.64 - 28.17                                                       |
| Index ranges                                    | -21 ≤ h ≤ 20<br>-22 ≤ k ≤ 23<br>-23 ≤ l ≤ 23                          | -22 ≤ h ≤ 24<br>-10 ≤ k ≤ 12<br>-19 ≤ l ≤ 19                           | -17 ≤ h ≤ 17<br>-17 ≤ k ≤ 17<br>-18 ≤ l ≤ 17                       |
| Reflections collected                           | 44894                                                                 | 20623                                                                  | 19812                                                              |
| Unique reflections                              | 6334                                                                  | 6001                                                                   | 9719                                                               |
| R <sub>int</sub>                                | 0.0684                                                                | 0.0573                                                                 | 0.0515                                                             |
| Refinement method                               | Full-matrix<br>least-squares on F <sup>2</sup>                        | Full-matrix<br>least-squares on F <sup>2</sup>                         | Full-matrix<br>least-squares on F <sup>2</sup>                     |
| Data/constraints/<br>parameters                 | 6334 / 0 / 492                                                        | 6001 / 1 / 330                                                         | 9719 / 0 / 756                                                     |
| Goodness-of-fit on R <sup>2</sup>               | 0.973                                                                 | 1.041                                                                  | 0.946                                                              |
| Final R indices [I > 2σ(I)]                     | R <sub>1</sub> = 0.0457<br>wR <sub>2</sub> = 0.1314                   | R <sub>1</sub> = 0.0357<br>wR <sub>2</sub> = 0.0940                    | R <sub>1</sub> = 0.0528<br>wR <sub>2</sub> = 0.1371                |
| R indices (all data)                            | R <sub>1</sub> = 0.0622<br>wR <sub>2</sub> = 0.1449                   | R <sub>1</sub> = 0.0397<br>wR <sub>2</sub> = 0.0971                    | R <sub>1</sub> = 0.0856<br>wR <sub>2</sub> = 0.1560                |
| Largest diff.<br>peak/hole [e Å <sup>-3</sup> ] | 0.903 and -1.193                                                      | 0.552 and -0.481                                                       | 0.694 and -1.228                                                   |

**Table S2** Bond lengths [Å] and angles [°]

| atoms             | <b>3</b>   | atoms             | <b>4</b>   | atoms           | <b>5</b>   |
|-------------------|------------|-------------------|------------|-----------------|------------|
| Co(1)-Cl(1)       | 2.3408(8)  | Co(1)-Cl(1)       | 2.3271(10) | Co(1)-O(1)      | 2.041(3)   |
| Co(1)-N(1)        | 2.189(2)   | Co(1)-N(1)        | 2.203(3)   | Co(1)-O(2)      | 2.783      |
| Co(1)-N(2)        | 2.142(2)   | Co(1)-N(2)        | 2.106(3)   | Co(1)-N(1)      | 2.228(2)   |
| Co(1)-N(3)        | 2.260(2)   | Co(1)-N(3)        | 2.134(3)   | Co(1)-N(2)      | 2.175(2)   |
| Co(1)-N(4)        | 2.110(2)   | Co(1)-N(4)        | 2.165(3)   | Co(1)-N(3)      | 2.143(2)   |
| Co(1)-N(5)        | 2.2093(19) | Co(1)-N(5)        | 2.267(3)   | Co(1)-N(4)      | 2.243(2)   |
|                   |            |                   |            | Co(1)-N(5)      | 2.211(3)   |
|                   |            |                   |            | C(28)-O(1)      | 1.244(4)   |
|                   |            |                   |            | C(28)-O(2)      | 1.179(4)   |
| Cal(1)-Co(1)-N(1) | 171.41(6)  | Cal(1)-Co(1)-N(1) | 169.20(10) | O(1)-Co(1)-N(1) | 152.82(10) |
| Cal(1)-Co(1)-N(2) | 94.14(6)   | Cal(1)-Co(1)-N(2) | 103.34(9)  | O(1)-Co(1)-N(2) | 84.67(10)  |
| Cl(1)-Co(1)-N(3)  | 88.77(6)   | Cl(1)-Co(1)-N(3)  | 93.32(10)  | O(1)-Co(1)-N(3) | 92.90(10)  |
| Cal(1)-Co(1)-N(4) | 103.78(7)  | Cal(1)-Co(1)-N(4) | 104.58(10) | O(1)-Co(1)-N(4) | 127.38(11) |
| Cl(1)-Co(1)-N(5)  | 102.73(6)  | Cal(1)-Co(1)-N(5) | 89.03(9)   | O(1)-Co(1)-N(5) | 90.16(11)  |
| N(1)-Co(1)-N(2)   | 77.58(8)   | N(1)-Co(1)-N(2)   | 75.31(14)  | N(1)-Co(1)-N(2) | 73.48(9)   |
| N(1)-Co(1)-N(3)   | 99.76(8)   | N(1)-Co(1)-N(3)   | 76.82(15)  | N(1)-Co(1)-N(3) | 76.52(9)   |
| N(1)-Co(1)-N(4)   | 76.24(8)   | N(1)-Co(1)-N(4)   | 81.13(13)  | N(1)-Co(1)-N(4) | 79.27(9)   |
| N(1)-Co(1)-N(5)   | 80.68(7)   | N(1)-Co(1)-N(5)   | 101.36(14) | N(1)-Co(1)-N(5) | 103.66(10) |
| N(2)-Co(1)-N(3)   | 170.70(8)  | N(2)-Co(1)-N(3)   | 104.22(13) | N(2)-Co(1)-N(3) | 102.11(9)  |
| N(2)-Co(1)-N(4)   | 102.99(8)  | N(2)-Co(1)-N(4)   | 144.33(13) | N(2)-Co(1)-N(4) | 141.57(9)  |
| N(2)-Co(1)-N(5)   | 96.08(8)   | N(2)-Co(1)-N(5)   | 83.02(12)  | N(2)-Co(1)-N(5) | 85.30(10)  |
| N(3)-Co(1)-N(4)   | 84.84(7)   | N(3)-Co(1)-N(4)   | 95.89(12)  | N(3)-Co(1)-N(4) | 97.21(8)   |
| N(3)-Co(1)-N(5)   | 74.64(7)   | N(3)-Co(1)-N(5)   | 171.62(13) | N(3)-Co(1)-N(5) | 172.21(9)  |
| N(4)-Co(1)-N(5)   | 145.89(8)  | N(4)-Co(1)-N(5)   | 75.74(13)  | N(4)-Co(1)-N(5) | 75.28(9)   |

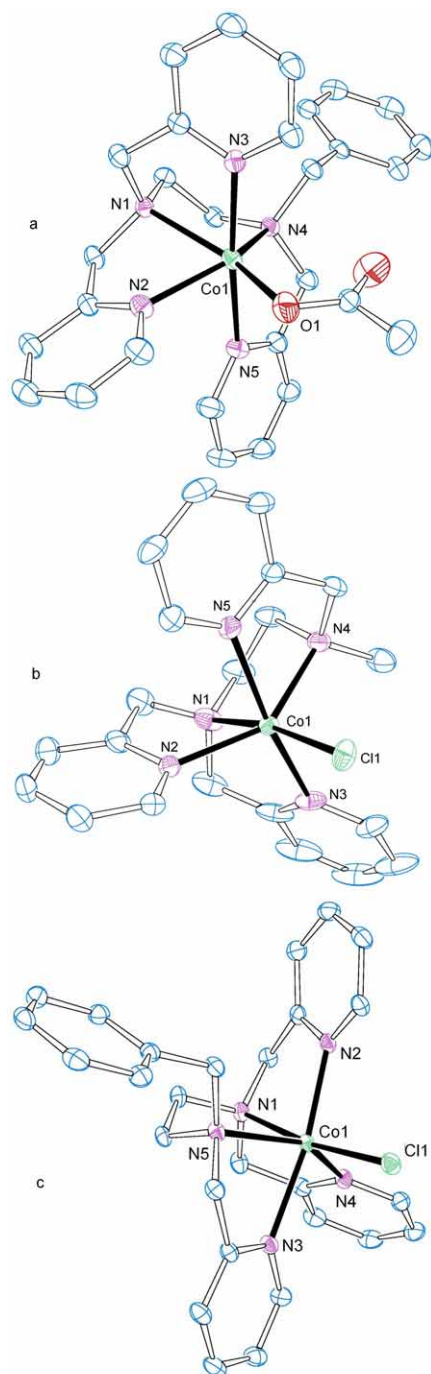

**Fig. S1** Ortep plot of the complex cations (a) [Co(bztpen)Cl]<sup>+</sup> (3) (b) [Co(metpen)Cl]<sup>+</sup> (4) and (c) [Co(bztpen)OAc]<sup>+</sup> (5). The thermal ellipsoids are shown at 30% probability. Hydrogen atoms are omitted for clarity.

## Kinetic analysis:

### Oxidation of [Fe(bztpen)Cl]ClO<sub>4</sub>

**Table S3:** Observed rate constants,  $k_{\text{obs}}$  (s<sup>-1</sup>), for the oxidation reaction of [Fe(bztpen)Cl]ClO<sub>4</sub> with H<sub>2</sub>O<sub>2</sub> in methanol calculated from absorbance vs. time traces at 393 nm. Each rate constant is the average of at least three kinetic runs.

| [H <sub>2</sub> O <sub>2</sub> ] [M] | -40°C       | -35°C       | -30°C       | -25°C      |
|--------------------------------------|-------------|-------------|-------------|------------|
| 0.01                                 | 0.19 ± 0.02 | 0.46 ± 0.04 | 0.8 ± 0.2   | 0.1 ± 0.1  |
| 0.05                                 | 0.63 ± 0.02 | 0.95 ± 0.03 | 1.47 ± 0.09 | 2.3 ± 0.1  |
| 0.10                                 | 1.05 ± 0.02 | 1.70 ± 0.05 | 2.43 ± 0.08 | 4.3 ± 0.1  |
| 0.16                                 | 1.59 ± 0.04 | 2.3 ± 0.1   | 3.4 ± 0.1   | 5.6 ± 0.2  |
| 0.25                                 | 1.59 ± 0.06 | 2.5 ± 0.1   |             |            |
| 0.375                                | 1.9 ± 0.2   | 2.8 ± 0.2   |             |            |
| 0.50                                 | 2.0 ± 0.4   | 3.5 ± 0.4   | 5.4 ± 0.1   | 10.3 ± 0.3 |
| 0.75                                 | 2.5 ± 0.5   | 4.6 ± 0.4   | 6.2 ± 0.1   | 15.1 ± 0.5 |
| 1.00                                 | 3.1 ± 0.5   | 5.8 ± 0.5   | 8.2 ± 0.2   | 16.3 ± 0.5 |
| 1.50                                 | 3.6 ± 0.3   |             |             |            |

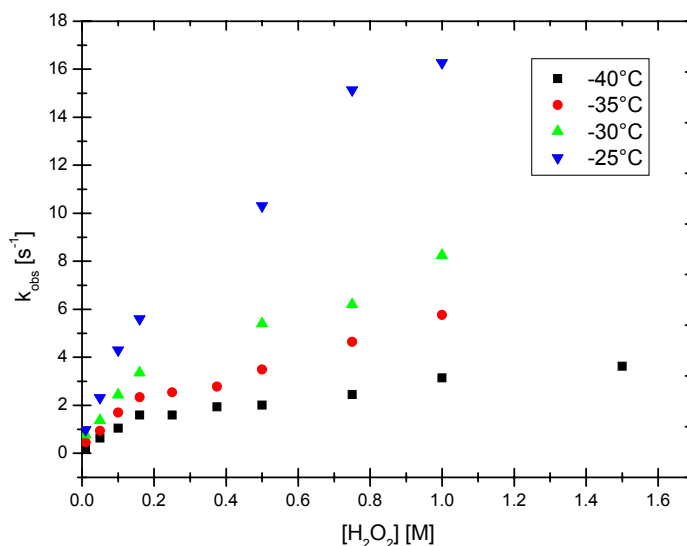

**Figure S2:**  $k_{\text{obs}}$  versus [H<sub>2</sub>O<sub>2</sub>] for the oxidation of [Fe(bztpen)Cl]ClO<sub>4</sub> by H<sub>2</sub>O<sub>2</sub> in methanol.

**Table S4:** Second order rate constants for the oxidation of [Fe(bztpen)Cl]ClO<sub>4</sub> by hydrogen peroxide in methanol calculated from the initial slopes of the curved data plots in Figure 1 as plotted in Figure 2.

| Temp. [°C] | $k$ [M <sup>-1</sup> s <sup>-1</sup> ] | Intercept [s <sup>-1</sup> ] |
|------------|----------------------------------------|------------------------------|
| -40°C      | 9.2 ± 0.3                              | 0.13 ± 0.03                  |
| -35°C      | 12.8 ± 0.6                             | 0.34 ± 0.06                  |
| -30°C      | 17.6 ± 0.9                             | 0.57 ± 0.08                  |
| -25°C      | 31 ± 3                                 | 0.8 ± 0.3                    |

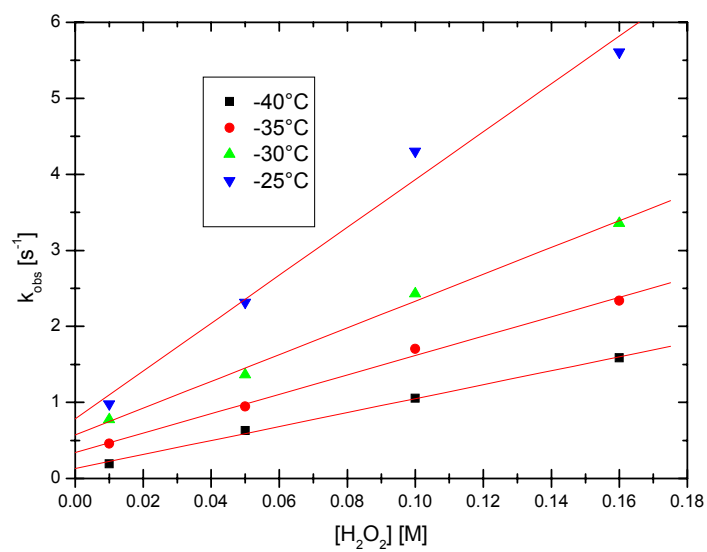

**Figure S3:**  $k_{\text{obs}}$  vs.  $[\text{H}_2\text{O}_2]$  to calculate the initial slopes and intercepts of the curved plots in Figure 1.

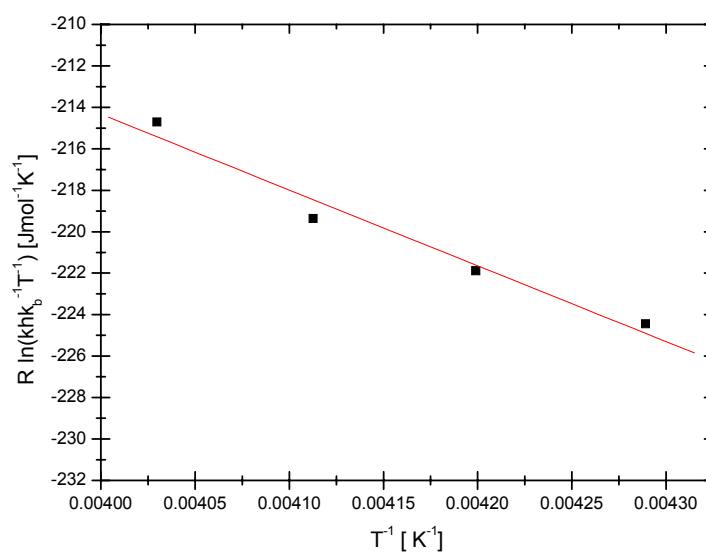

**Figure S5:** “Eyring plot” for the oxidation of  $[\text{Fe}(\text{bztpen})\text{Cl}]\text{ClO}_4$  in methanol.

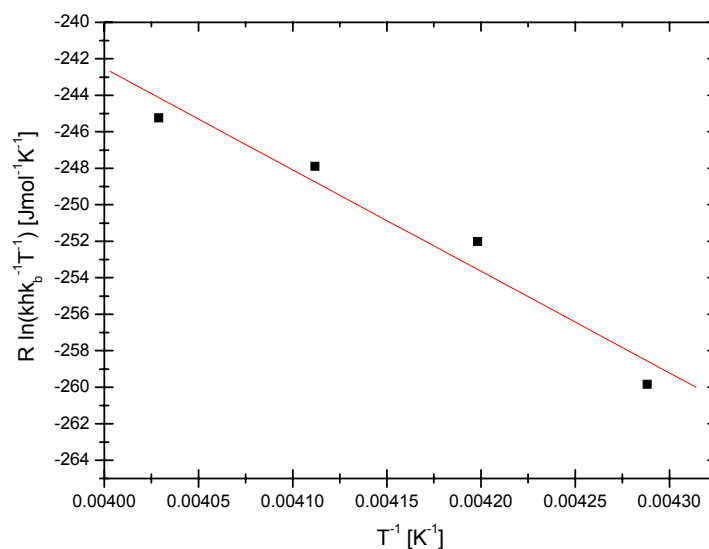

**Figure S6:** “Eyring plot” for the back reaction of the oxidation of  $[Fe(bztpen)Cl]ClO_4$  in methanol.

**Table S5:** Activation parameters for the oxidation reaction of  $[Fe(bztpen)Cl]ClO_4$  in methanol calculated from the “Eyring plots” in Figure 3 and Figure 4.

|               | $\Delta H^\ddagger [kJ mol^{-1}]$ | $\Delta S^\ddagger [J mol^{-1} K^{-1}]$ |
|---------------|-----------------------------------|-----------------------------------------|
|               | $37 \pm 5$                        | $-68 \pm 20$                            |
| Back reaction | $56 \pm 9$                        | $(-19 \pm 37)$                          |

The  $\Delta S^\ddagger$  value for the back reaction has no meaning due to the large error limits, which are normal for calculations from intercepts.

## Formation of $[\text{Fe}(\text{bztpen})\text{OOH}]^{2+}$

**Table S6:** Observed rate constants,  $k_{\text{obs}}$  ( $\text{s}^{-1}$ ), for the reaction of the formation reaction of  $[\text{Fe}(\text{bztpen})\text{OOH}]^{2+}$  in methanol calculated from absorbance vs. time traces at 550 nm. Each rate constant is an average of at least three measurements.

| $[\text{H}_2\text{O}_2]$ [M] | 20°C                | 25°C                | 30°C                | 35°C                | 40°C                |
|------------------------------|---------------------|---------------------|---------------------|---------------------|---------------------|
| 0.01                         | $0.0268 \pm 0.0001$ | $0.0380 \pm 0.0001$ | $0.0575 \pm 0.0002$ | $0.0856 \pm 0.0003$ | $0.1316 \pm 0.0005$ |
| 0.02                         | $0.0365 \pm 0.0001$ | $0.0526 \pm 0.0002$ | $0.0800 \pm 0.0002$ | $0.1173 \pm 0.0004$ | $0.1805 \pm 0.0004$ |
| 0.04                         | $0.0662 \pm 0.0002$ | $0.0927 \pm 0.0002$ | $0.1290 \pm 0.0004$ | $0.1830 \pm 0.0004$ | $0.2725 \pm 0.0008$ |
| 0.06                         | $0.0873 \pm 0.0002$ | $0.1230 \pm 0.0003$ | $0.1772 \pm 0.0004$ | $0.2595 \pm 0.0006$ | $0.3643 \pm 0.0008$ |
| 0.08                         |                     |                     |                     | $0.3433 \pm 0.0007$ | $0.482 \pm 0.001$   |

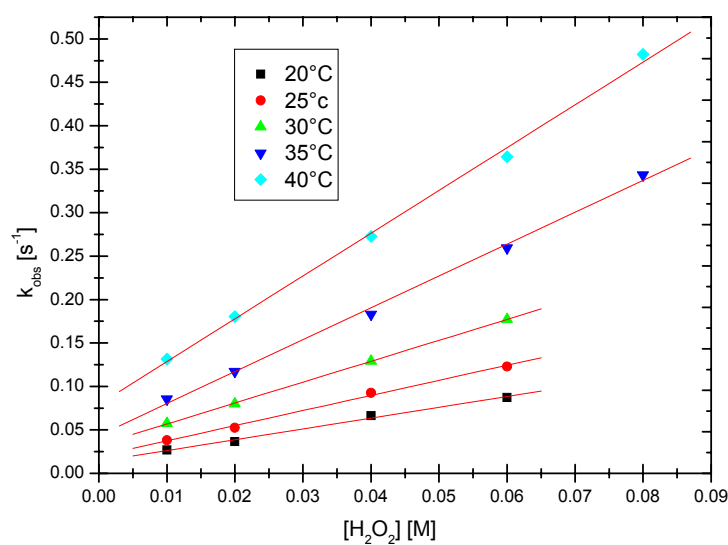

**Figure S6:**  $k_{\text{obs}}$  vs.  $[\text{H}_2\text{O}_2]$  for the formation of  $[\text{Fe}(\text{bztpen})\text{OOH}]^{2+}$

**Table S7:** Second order rate constants for the formation reaction of the iron(III) hydroperoxido complex with  $\text{H}_2\text{O}_2$  in methanol calculated from slope of the straight lines.

| Temp. [°C] | $k$ [ $\text{M}^{-1} \text{s}^{-1}$ ] | Intercept [ $\text{s}^{-1}$ ] |
|------------|---------------------------------------|-------------------------------|
| 20         | $1.24 \pm 0.07$                       | $0.014 \pm 0.003$             |
| 25         | $1.74 \pm 0.08$                       | $0.020 \pm 0.003$             |
| 30         | $2.41 \pm 0.01$                       | $0.0328 \pm 0.0007$           |
| 35         | $3.7 \pm 0.1$                         | $0.044 \pm 0.006$             |

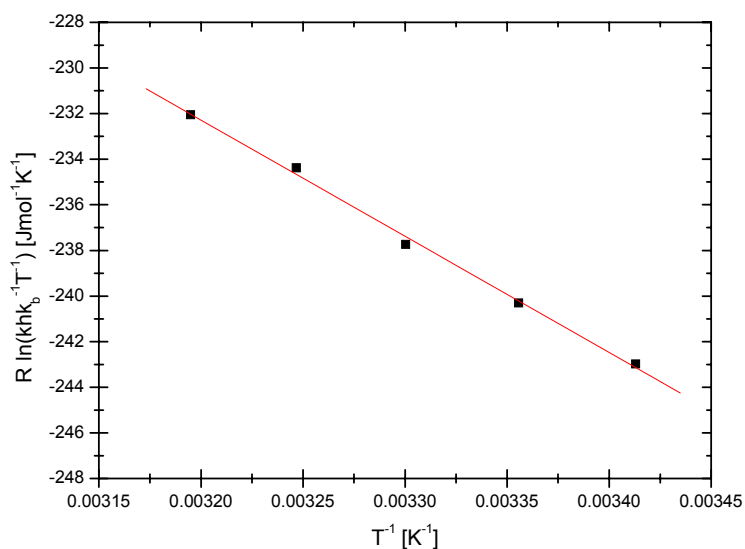

**Figure S7:** “Eyring plot” for the formation of  $[Fe(bztpen)OOH]^{2+}$ .

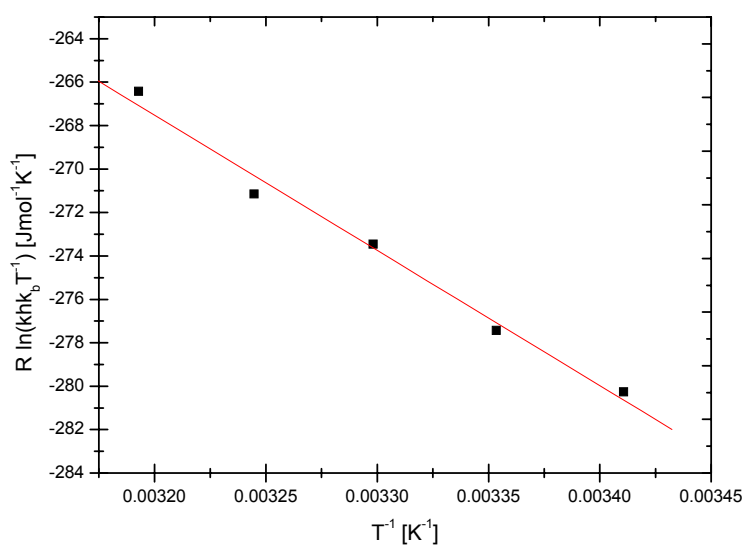

**Figure S8:** “Eyring plot” for the back reaction of the formation of  $[Fe(bztpen)OOH]^{2+}$ .

**Table S8:** Activation parameters for the formation reaction of hydroperoxido complex in methanol calculated from the “Eyring plots” in Figure 6 and Figure 7.

|               | $\Delta H^\ddagger [kJ mol^{-1}]$ | $\Delta S^\ddagger [J mol^{-1} K^{-1}]$ |
|---------------|-----------------------------------|-----------------------------------------|
|               | $51 \pm 2$                        | $-69 \pm 5$                             |
| Back reaction | $62 \pm 4$                        | $-68 \pm 13$                            |



## High pressure kinetics

**Table S9:** Observed rate constants,  $k_{\text{obs}}$  ( $\text{s}^{-1}$ ), for the formation of  $[\text{Fe}(\text{bztpen})\text{OOH}]^{2+}$  in methanol under high pressure conditions at 27 °C calculated from absorbance vs. time traces at 550 nm. Each rate constant is an average of at least three measurements.

| $[\text{H}_2\text{O}_2]$ [M] | 100 MPa | 500 MPa | 800 MPa | 1100 MPa | 1300 MPa |
|------------------------------|---------|---------|---------|----------|----------|
| 0.053                        | 0.090   | 0.090   | 0.080   | 0.090    |          |
| 0.080                        | 0.128   | 0.125   | 0.123   |          | 0.122    |
| 0.106                        | 0.171   | 0.166   | 0.163   |          | 0.152    |
| 0.133                        | 0.193   | 0.197   | 0.188   | 0.199    | 0.192    |

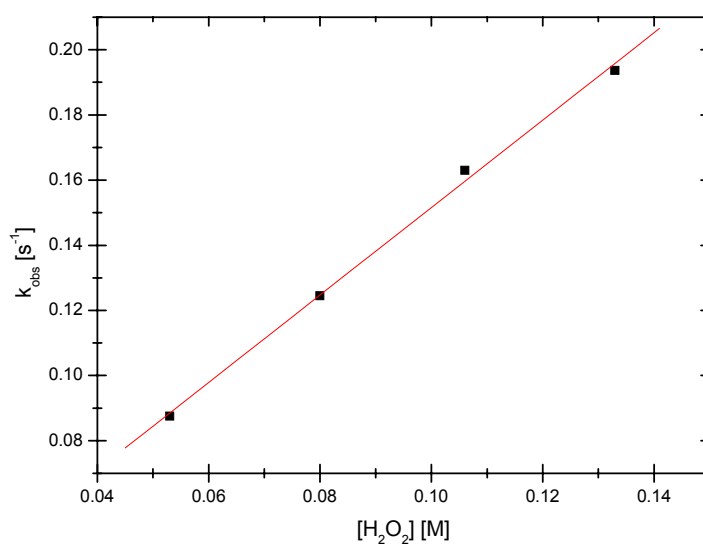

**Figure S9:**  $k_{\text{obs}}$  vs.  $[\text{H}_2\text{O}_2]$  for the formation of  $[\text{Fe}(\text{bztpen})\text{OOH}]^{2+}$  under high pressure conditions at 27°C (data point are average values over all pressures).

**Table S10:** Second order rate constants for the formation of  $[\text{Fe}(\text{bztpen})\text{OOH}]^{2+}$  with  $\text{H}_2\text{O}_2$  in methanol under high pressure conditions calculated from the straight line.

| Temp. [°C] | $k$ [ $\text{M}^{-1}\text{s}^{-1}$ ] | Intercept [ $\text{s}^{-1}$ ] |
|------------|--------------------------------------|-------------------------------|
| 27         | $1.34 \pm 0.05$                      | $0.0017 \pm 0.0005$           |
